# Supplementary material for: Toward a low-cost uranium-adsorbing material based on nonwoven fabrics and photografting technology
Source: Royal Society of Chemistry journal article supplement (doi:10.1039/d4im00034j), 2024-08-06
Supplement: d4im00034j1.pdf [file d4im00034j1.pdf]

## Supporting information

### Toward a Low-Cost Uranium-Adsorbing Material based on Nonwoven Fabrics and Photografting Technology

Zhiwei Zhong, Yanbin Huang\*, Wantai Yang\*

*Department of Chemical Engineering, Tsinghua University, Beijing 100084, China*

---

\* Corresponding authors.

*E-mail addresses:* yanbin@tsinghua.edu.cn (Yanbin Huang), yangwantai@tsinghua.edu.cn (Wantai. Yang).

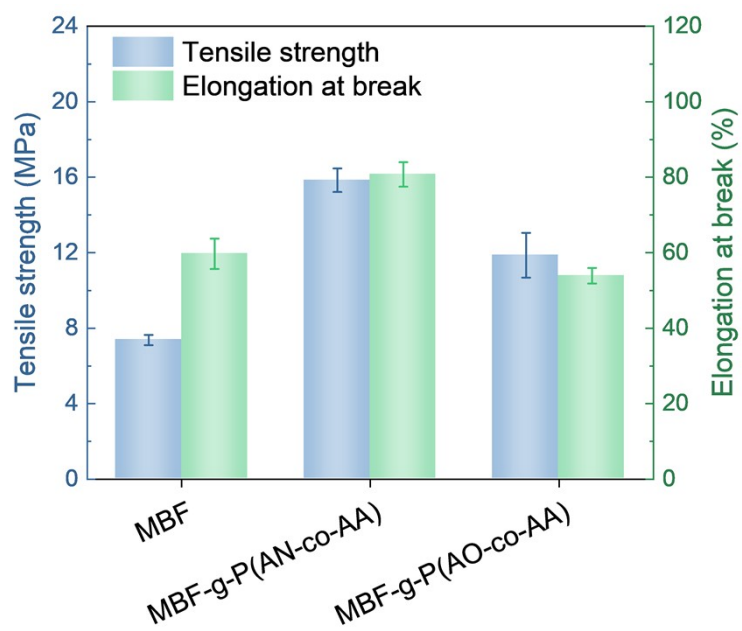

**Fig. S1.** Tensile strength and elongation at break of (a) MBF, (b) MBF-g-P(AN-co-AA), (c) MBF-g-P(AO-co-AA).

**Table S1**

Comparison of the uranium adsorption capability of the prepared MBF-g-P(AO-co-AA) with other amidoxime adsorbents reported in the literature

| preparation method               | adsorbents                                              |                  | Max U uptake in spiked system (mg/g) | U and V uptake in simulated seawater |          | References |
|----------------------------------|---------------------------------------------------------|------------------|--------------------------------------|--------------------------------------|----------|------------|
|                                  | substrate                                               | grafted monomers |                                      | U (mg/g)                             | V (mg/g) |            |
| grafting                         | polyethylene nanofibrous membranes                      | AN, AA           | 228.53                               | 10.19                                | 5.58     | 1          |
|                                  | ultra-high molecular weight polyethylene (UHMWPE) fiber | AN, AA           | -                                    | 3.62~8.1                             | -        | 2          |
|                                  | UHMWPE fiber                                            | AN, AA           | -                                    | 15.98                                | 0.33     | 3          |
|                                  | UHMWPE fiber                                            | AN, MAA          | 112.4                                | 7.4                                  | -        | 4          |
|                                  | PP/PE fiber                                             | AN, AA           | -                                    | 1.3~5.73                             | -        | 5          |
|                                  | UHMWPE fiber                                            | AN, AA           | -                                    | 4.54                                 | -        | 6          |
| direct synthesis                 | poly(amidoxime) porous network membranes                |                  | 881                                  | 32.95                                | ~31      | 7          |
|                                  | polyamidoxime/alginate sponge                           |                  | 718.38                               | 17.22                                | 20.61    | 8          |
|                                  | poly(imide dioxime) (PIDO)/alginate sponge              |                  | 291.51                               | 6.90                                 | 7.72     | 9          |
|                                  | poly(amidoxime) (PAO) hydrogel membrane                 |                  | 556                                  | 13.1                                 | 10.4     | 10         |
|                                  | poly(imide dioxime) nanofiber                           |                  | 1124.22                              | 30.8                                 | 23.4     | 11         |
|                                  | hydroxyapatite aerogel                                  |                  | 2087.6                               | -                                    | -        | 12         |
|                                  | polyurea-cross-linked calcium alginate                  |                  | 2023                                 | -                                    | -        | 13         |
|                                  | Reduced graphene oxide/ZIF-67                           |                  | 1888.55                              | -                                    | -        | 14         |
| 3D alumina-doped magnesium oxide |                                                         | 1046.9           | -                                    | -                                    | 15       |            |
| grafting                         | melt-blown nonwoven fabric                              | AN, AA           | 400                                  | 3.8                                  | 3.2      | This work  |

Note: “-” represents the corresponding data is undetermined or unmentioned in the references.

## References

1. R. Yu, X. S. Zhang, Y. R. Lu, W. Chen, X. Chen and L. B. Li, Advanced amidoximated polyethylene nanofibrous membranes for practical uranium extraction from seawater, *ACS Sustainable Chem. Eng.*, 2022, **10**, 12307-12318.
2. R. Li, L. Pang, H. Ma, X. Liu, M. Zhang, Q. Gao, H. Wang, Z. Xing, M. Wang and G. Wu, Optimization of molar content of amidoxime and acrylic acid in UHMWPE fibers for improvement of seawater uranium adsorption capacity, *J. Radioanal. Nucl. Chem.*, 2016, **311**, 1771-1779.
3. X. Xu, L. Xu, J. Ao, Y. Liang, C. Li, Y. Wang, C. Huang, F. Ye, Q. Li, X. Guo, J. Li, H. Wang, S. Ma and H. Ma, Ultrahigh and economical uranium extraction from seawater via interconnected open-pore architecture poly(amidoxime) fiber, *J. Mater. Chem. A*, 2020, **8**, 22032-22044.
4. R. Li, X. X. Feng, M. X. Zhang, Z. Xing and G. Z. Wu, A greener amidoximation process for fabrication of popular uranium complexing fiber using water as the single solvent, *ACS Omega*, 2021, **6**, 1894-1900.
5. X. Xu, H. Zhang, J. Ao, L. Xu, X. Liu, X. Guo, J. Li, L. Zhang, Q. Li, X. Zhao, B. Ye, D. Wang, F. Shen and H. Ma, 3D hierarchical porous amidoxime fibers speed up uranium extraction from seawater, *Energy & Environmental Science*, 2019, **12**, 1979-1988.
6. J. Hu, H. Ma, Z. Xing, X. Liu, L. Xu, R. Li, C. Lin, M. Wang, J. Li and G. Wu, Preparation of amidoximated ultrahigh molecular weight polyethylene fiber by radiation grafting and uranium adsorption test, *Ind. Eng. Chem. Res.*, 2015, **55**, 4118-4124.

7. S. Shi, Y. X. Qian, P. P. Mei, Y. H. Yuan, N. Jia, M. Y. Dong, J. C. Fan, Z. H. Guo and N. Wang, Robust flexible poly(amidoxime) porous network membranes for highly efficient uranium extraction from seawater, *Nano Energy*, 2020, **71**, 104629.
8. C. Han, Y. Yue, X. Xu, D. Cai, Z. Liu, S. Chen, L. Luo, J. Xiao and D. Wang, Dual crosslinked polyamidoxime/alginate sponge for robust and efficient uranium adsorption from aqueous solution, *New Journal of Chemistry*, 2020, **44**, 19445-19449.
9. D. Wang, J. Song, S. Lin, J. Wen, C. Ma, Y. Yuan, M. Lei, X. Wang, N. Wang and H. Wu, A marine inspired hybrid sponge for highly efficient uranium extraction from seawater, *Adv. Funct. Mater.*, 2019, **29**, 1901009.
10. C. X. Ma, J. X. Gao, D. Wang, Y. H. Yuan, J. Wen, B. J. Yan, S. L. Zhao, X. M. Zhao, Y. Sun, X. L. Wang and N. Wang, Sunlight polymerization of poly(amidoxime) hydrogel membrane for enhanced uranium extraction from seawater, *Adv. Sci.*, 2019, **6**, 1900085.
11. D. Wang, J. A. Song, J. Wen, Y. H. Yuan, Z. L. Liu, S. Lin, H. Y. Wang, H. L. Wang, S. L. Zhao, X. M. Zhao, M. H. Fang, M. Lei, B. Li, N. Wang, X. L. Wang and H. Wu, Significantly enhanced uranium extraction from seawater with mass produced fully amidoximated nanofiber adsorbent, *Adv. Energy Mater.*, 2018, **8**, 1802607.
12. T. Xiong, Q. Li, J. Liao, Y. Zhang and W. Zhu, Highly enhanced adsorption performance to uranium(VI) by facile synthesized hydroxyapatite aerogel, *J. Hazard. Mater.*, 2022, **423**, 127184.
13. E. Georgiou, G. Raptopoulos, M. Papastergiou, P. Paraskevopoulou and I. Pashalidis, Extremely efficient uranium removal from aqueous environments with polyurea-cross-linked alginate aerogel beads, *ACS Appl. Polym. Mater.*, 2022, **4**, 920-928.
14. M. Zhao, A. Tesfay Reda and D. Zhang, Reduced graphene oxide/ZIF-67 aerogel composite material for uranium adsorption in aqueous solutions, *ACS Omega*, 2020, **5**, 8012-8022.
15. Y. Lei, K. Li, J. Liao, Y. Zhang, L. Zhang and W. Zhu, Design of 3D alumina-doped magnesium oxide aerogels with a high efficiency removal of uranium(VI) from wastewater, *Inorg. Chem. Front.*, 2021, **8**, 2561-2574.
